# Supplementary material
Source: PubMed Central journal article supplement (PMC2323328)

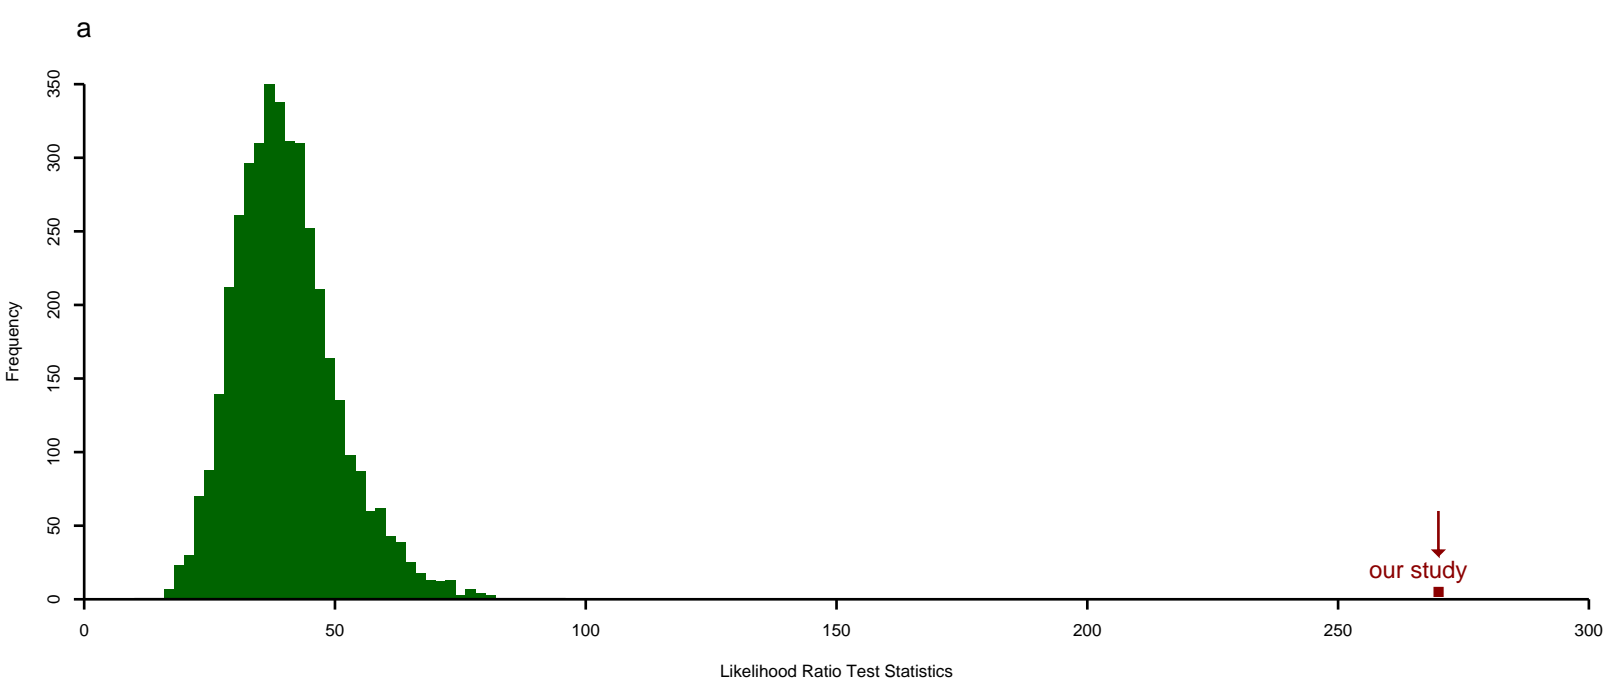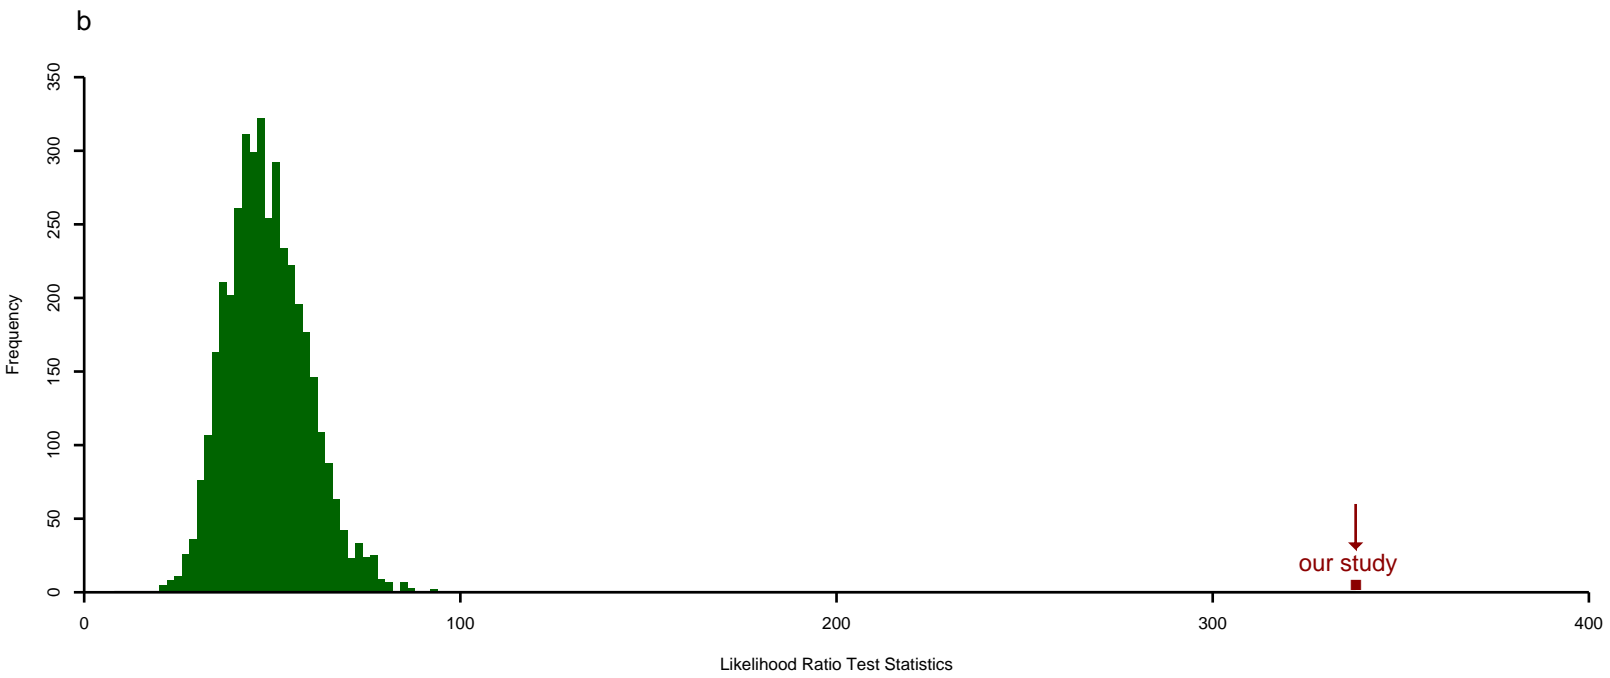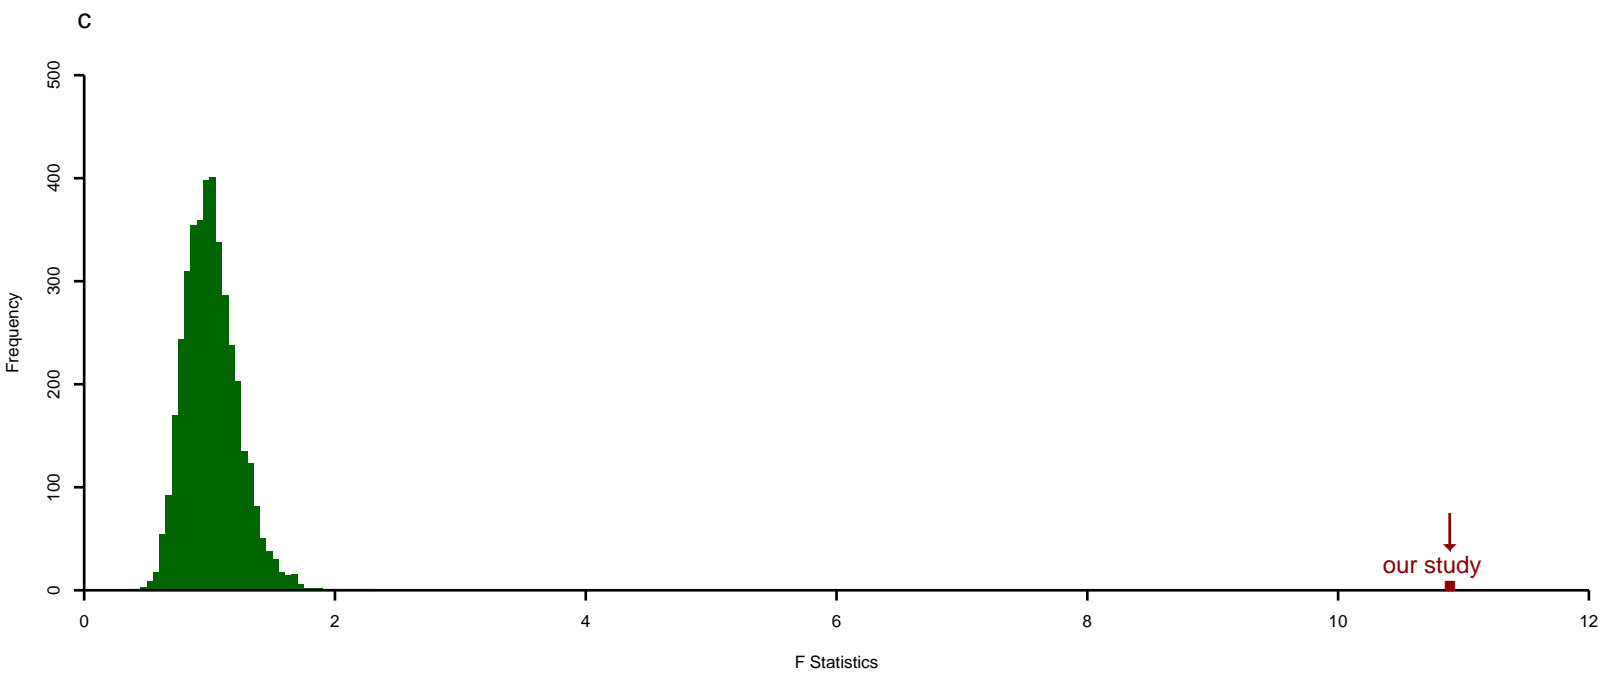

Supplement: pgen.0030098.sg001.pdf [file pgen.0030098.sg001.pdf]

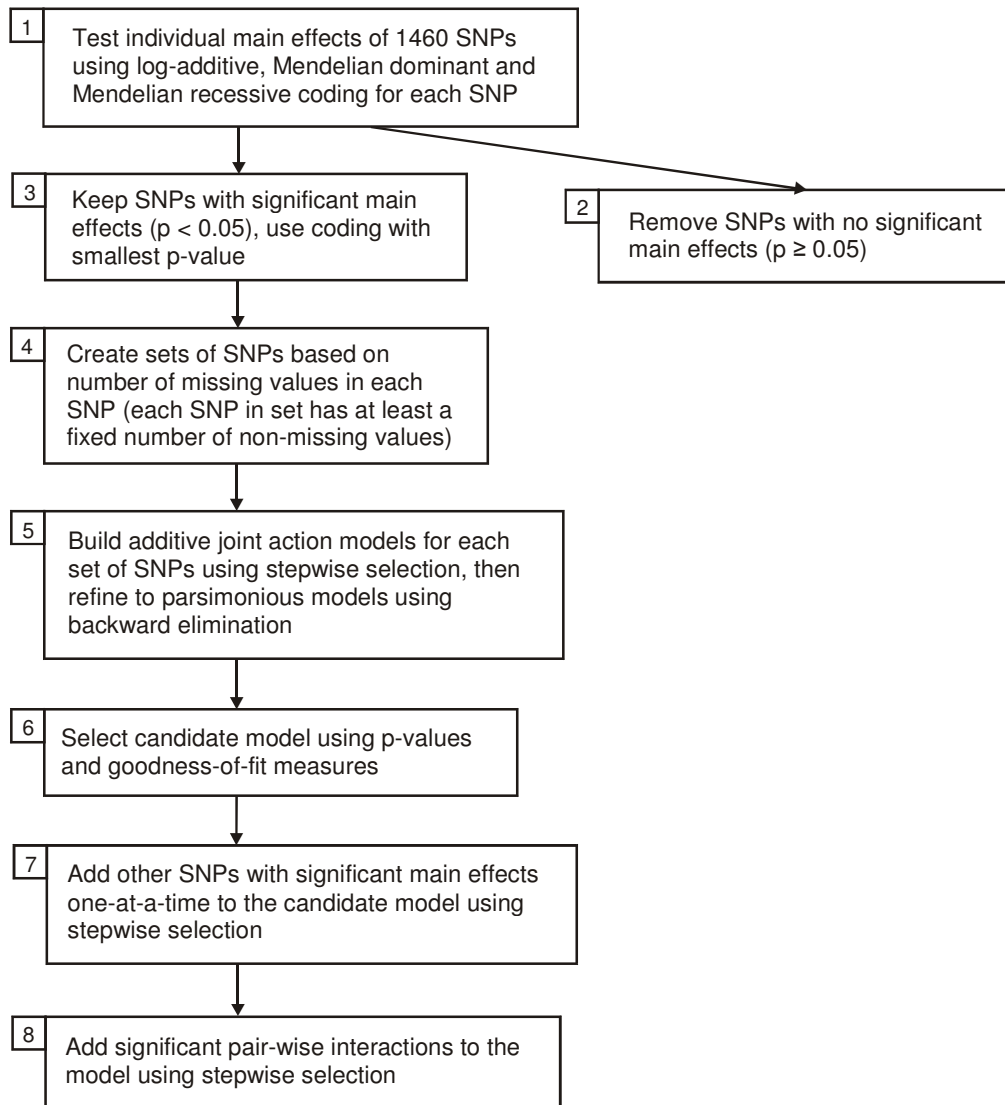

Supplement: pgen.0030098.sg002.pdf [file pgen.0030098.sg002.pdf]

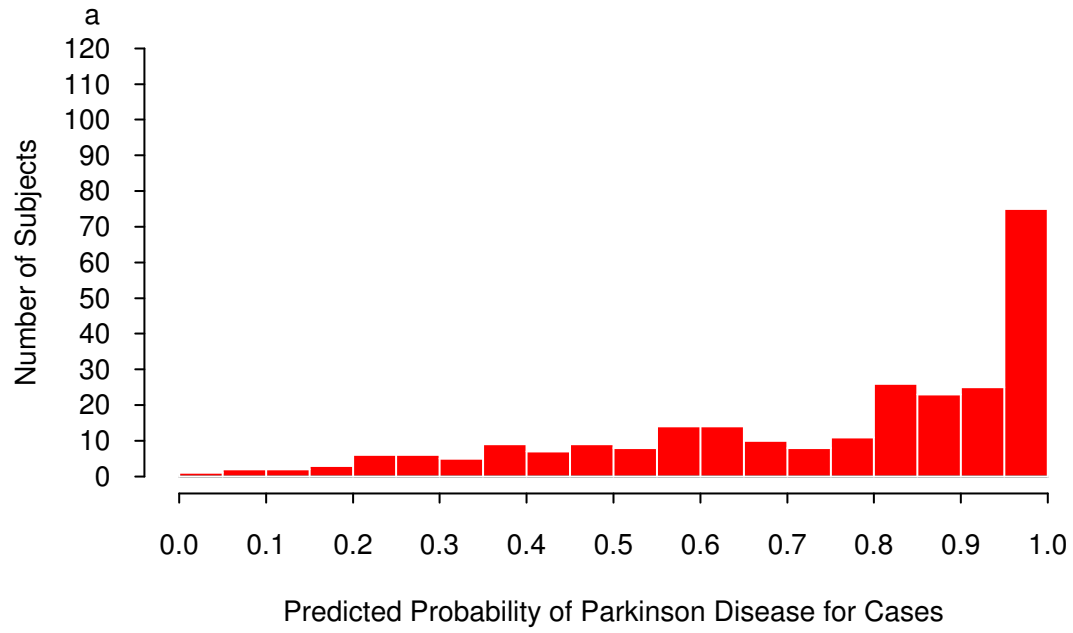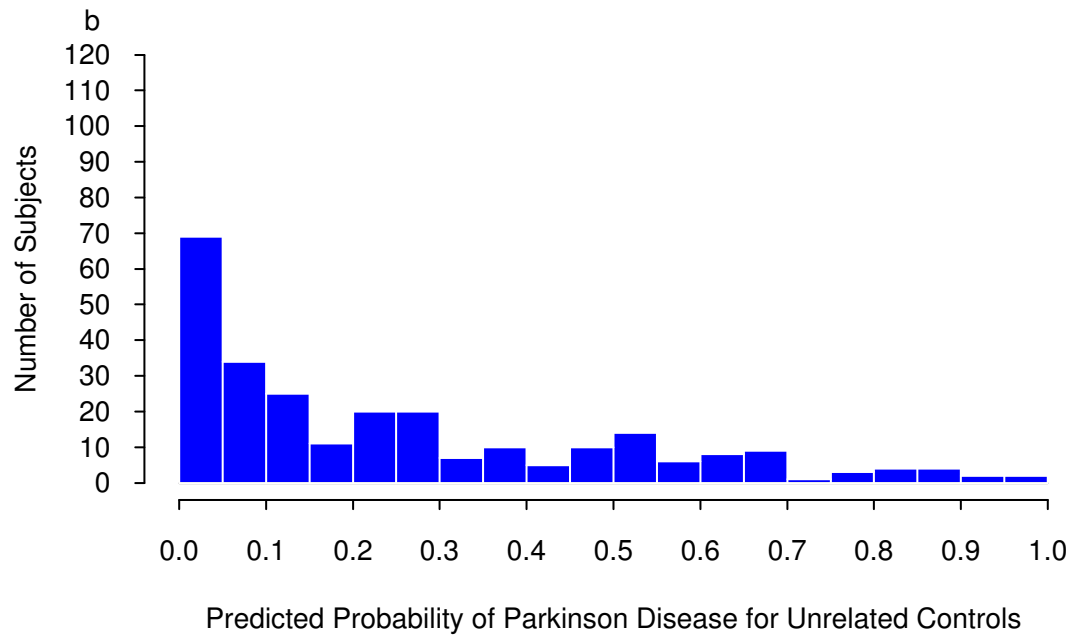

Supplement: pgen.0030098.sg003.pdf [file pgen.0030098.sg003.pdf]

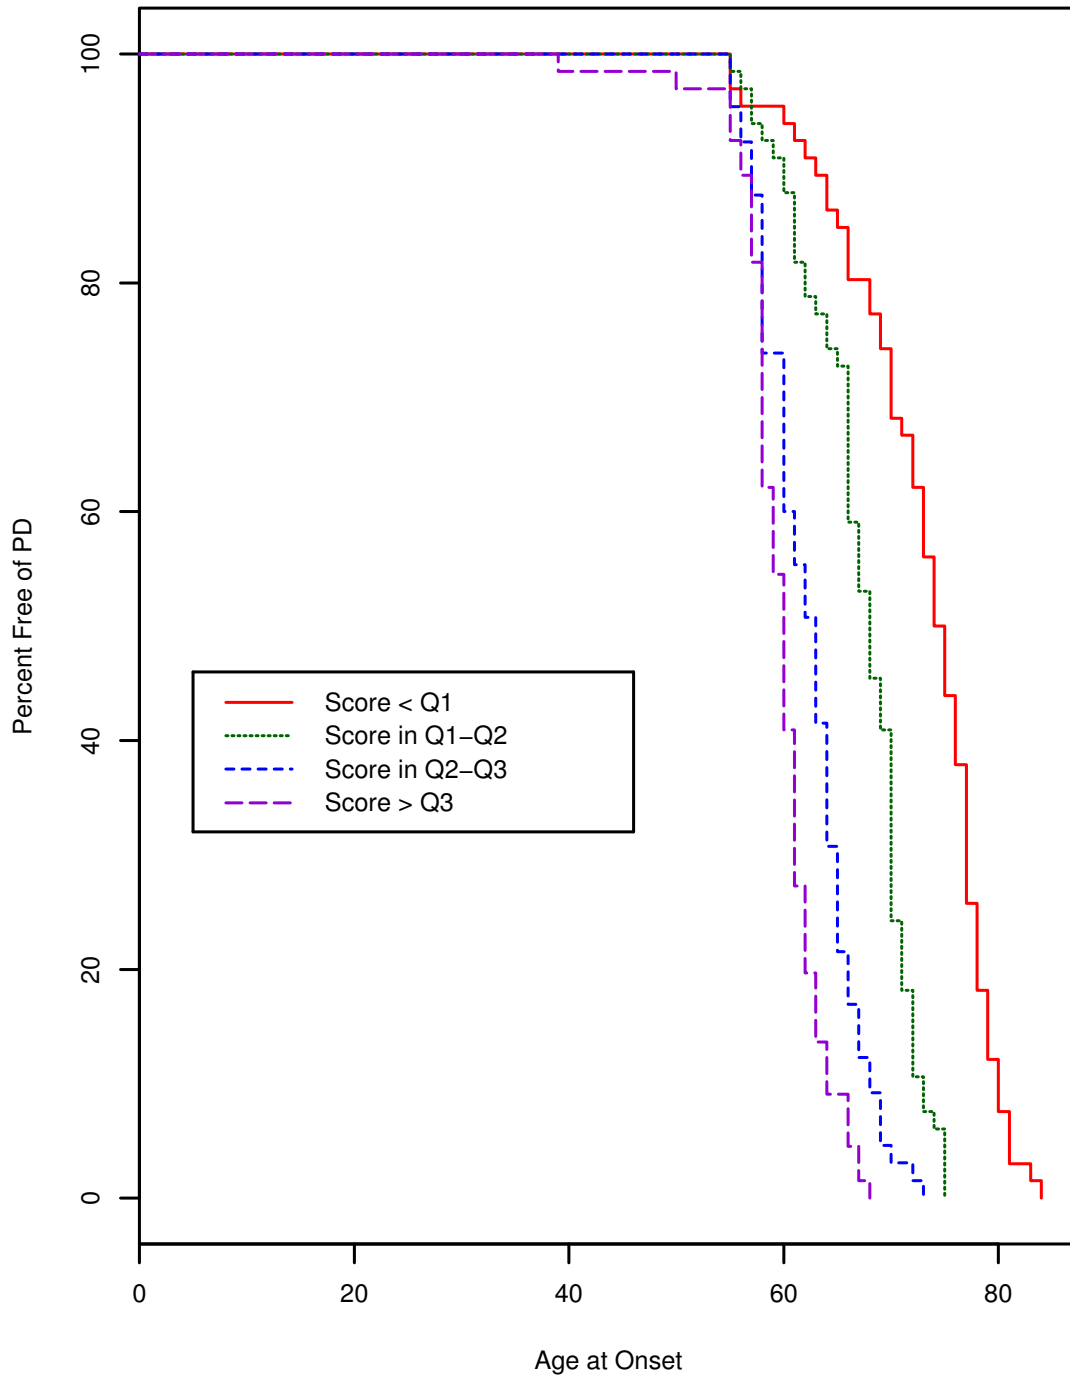

Supplement: pgen.0030098.sg004.pdf [file pgen.0030098.sg004.pdf]

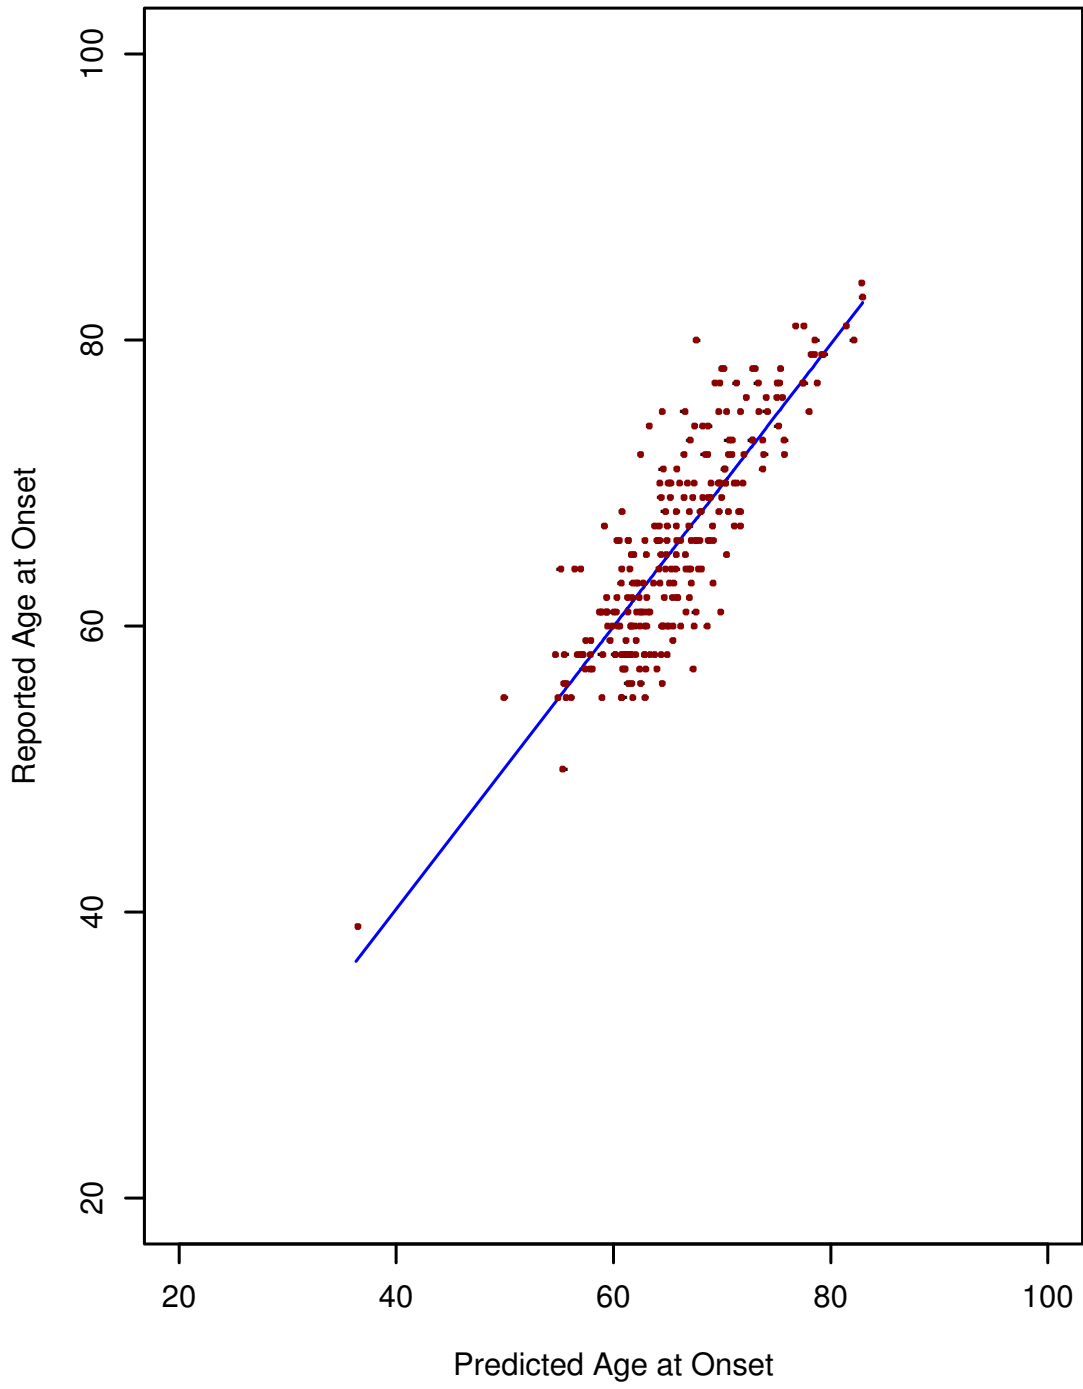

Supplement: pgen.0030098.sg005.pdf [file pgen.0030098.sg005.pdf]
